# Supplementary figures and images for: Task-dependent learning and memory deficits in the TgF344-AD rat model of Alzheimer’s disease: Three key timepoints from young adulthood to middle-age in females
Source: Research Square preprint supplement (doi:10.21203/rs.3.rs-1482938/v1), 2022-04-06

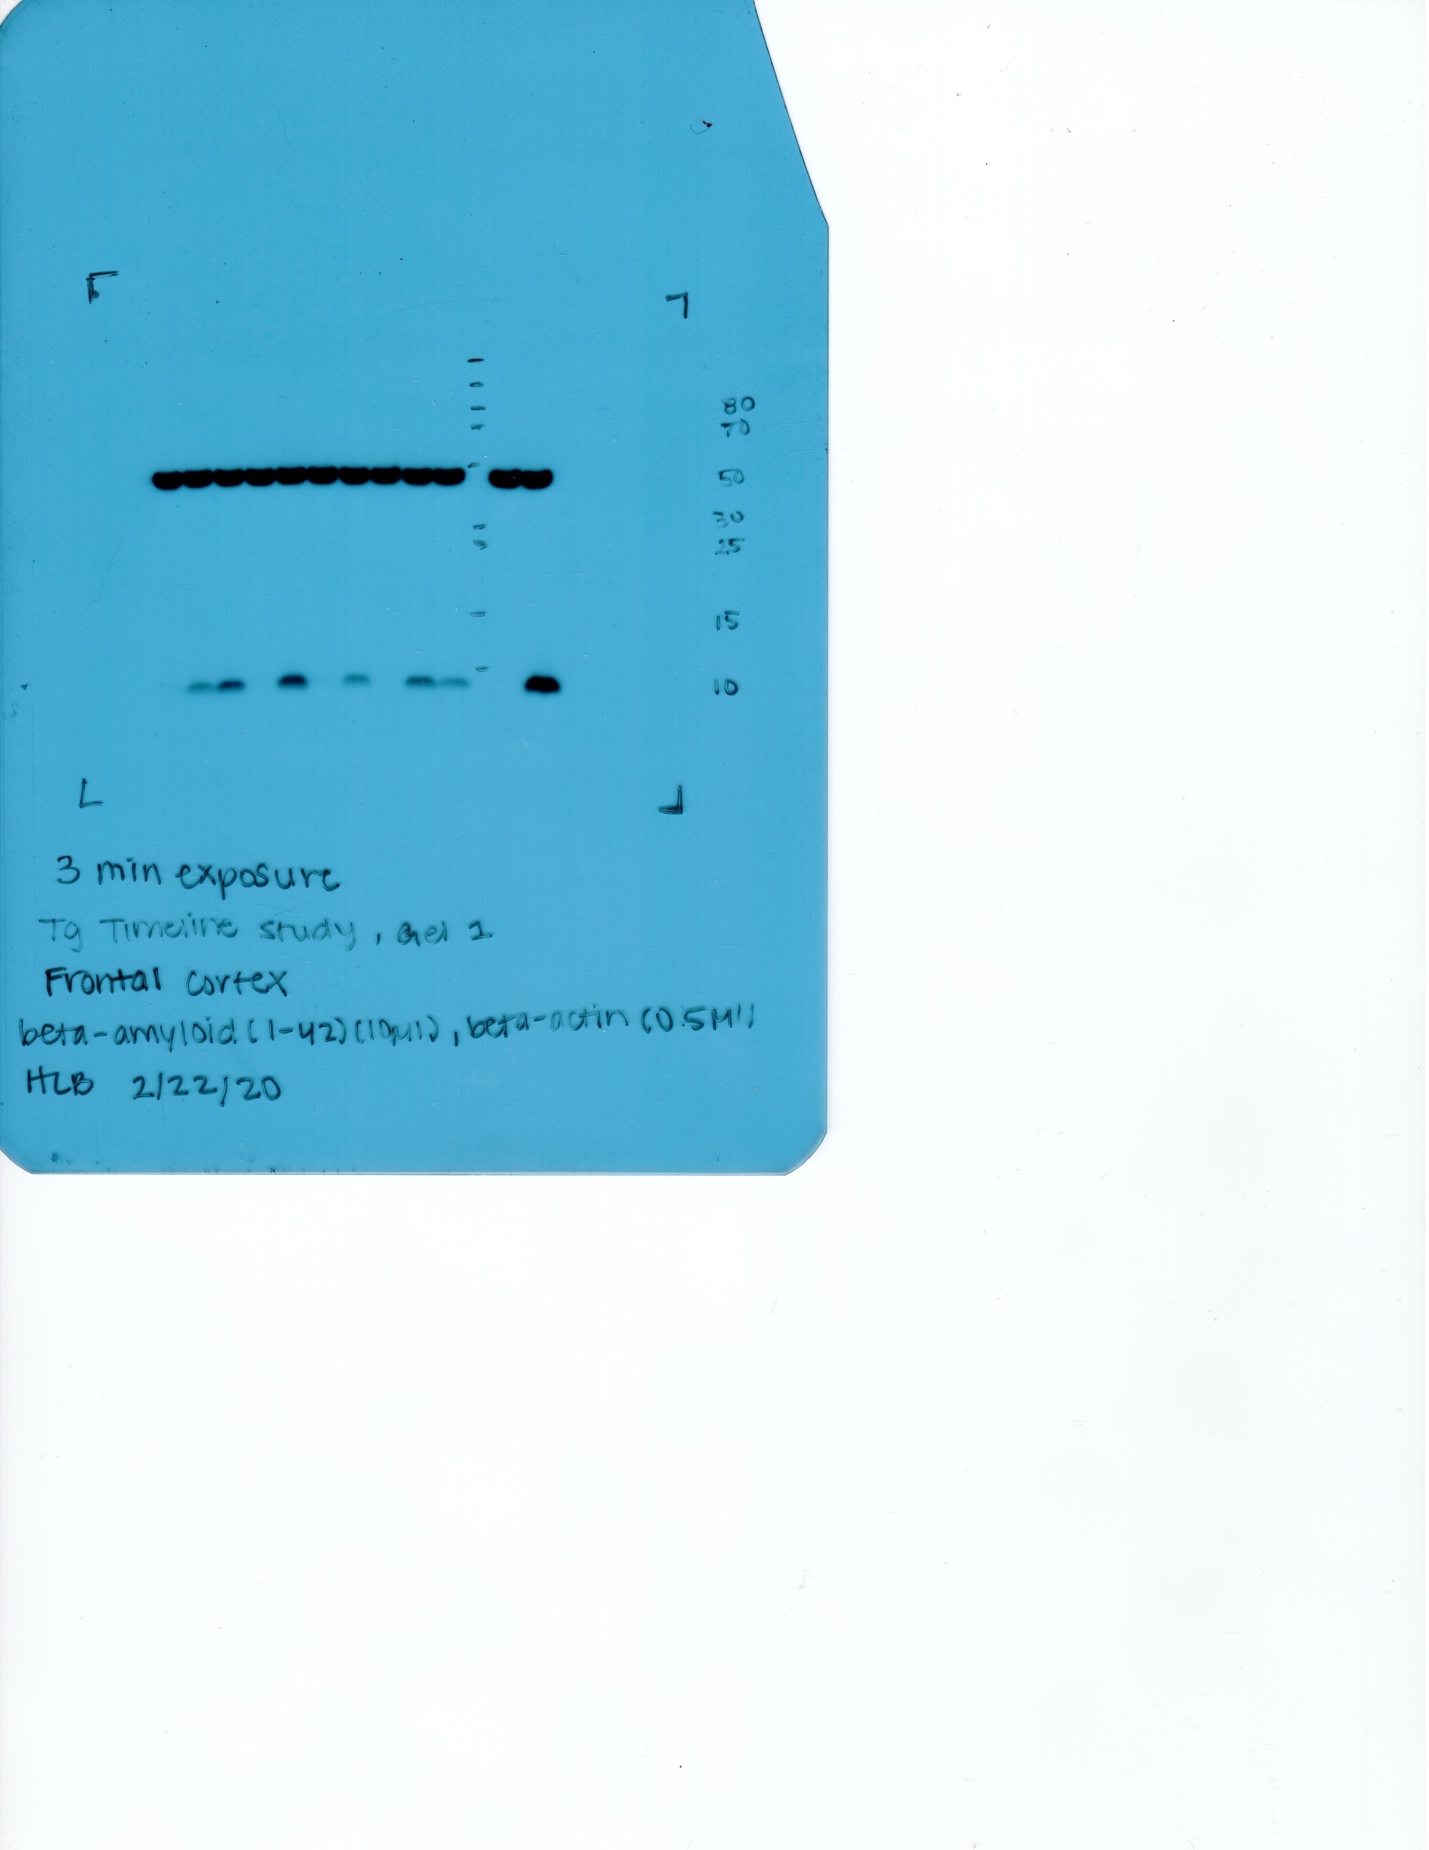


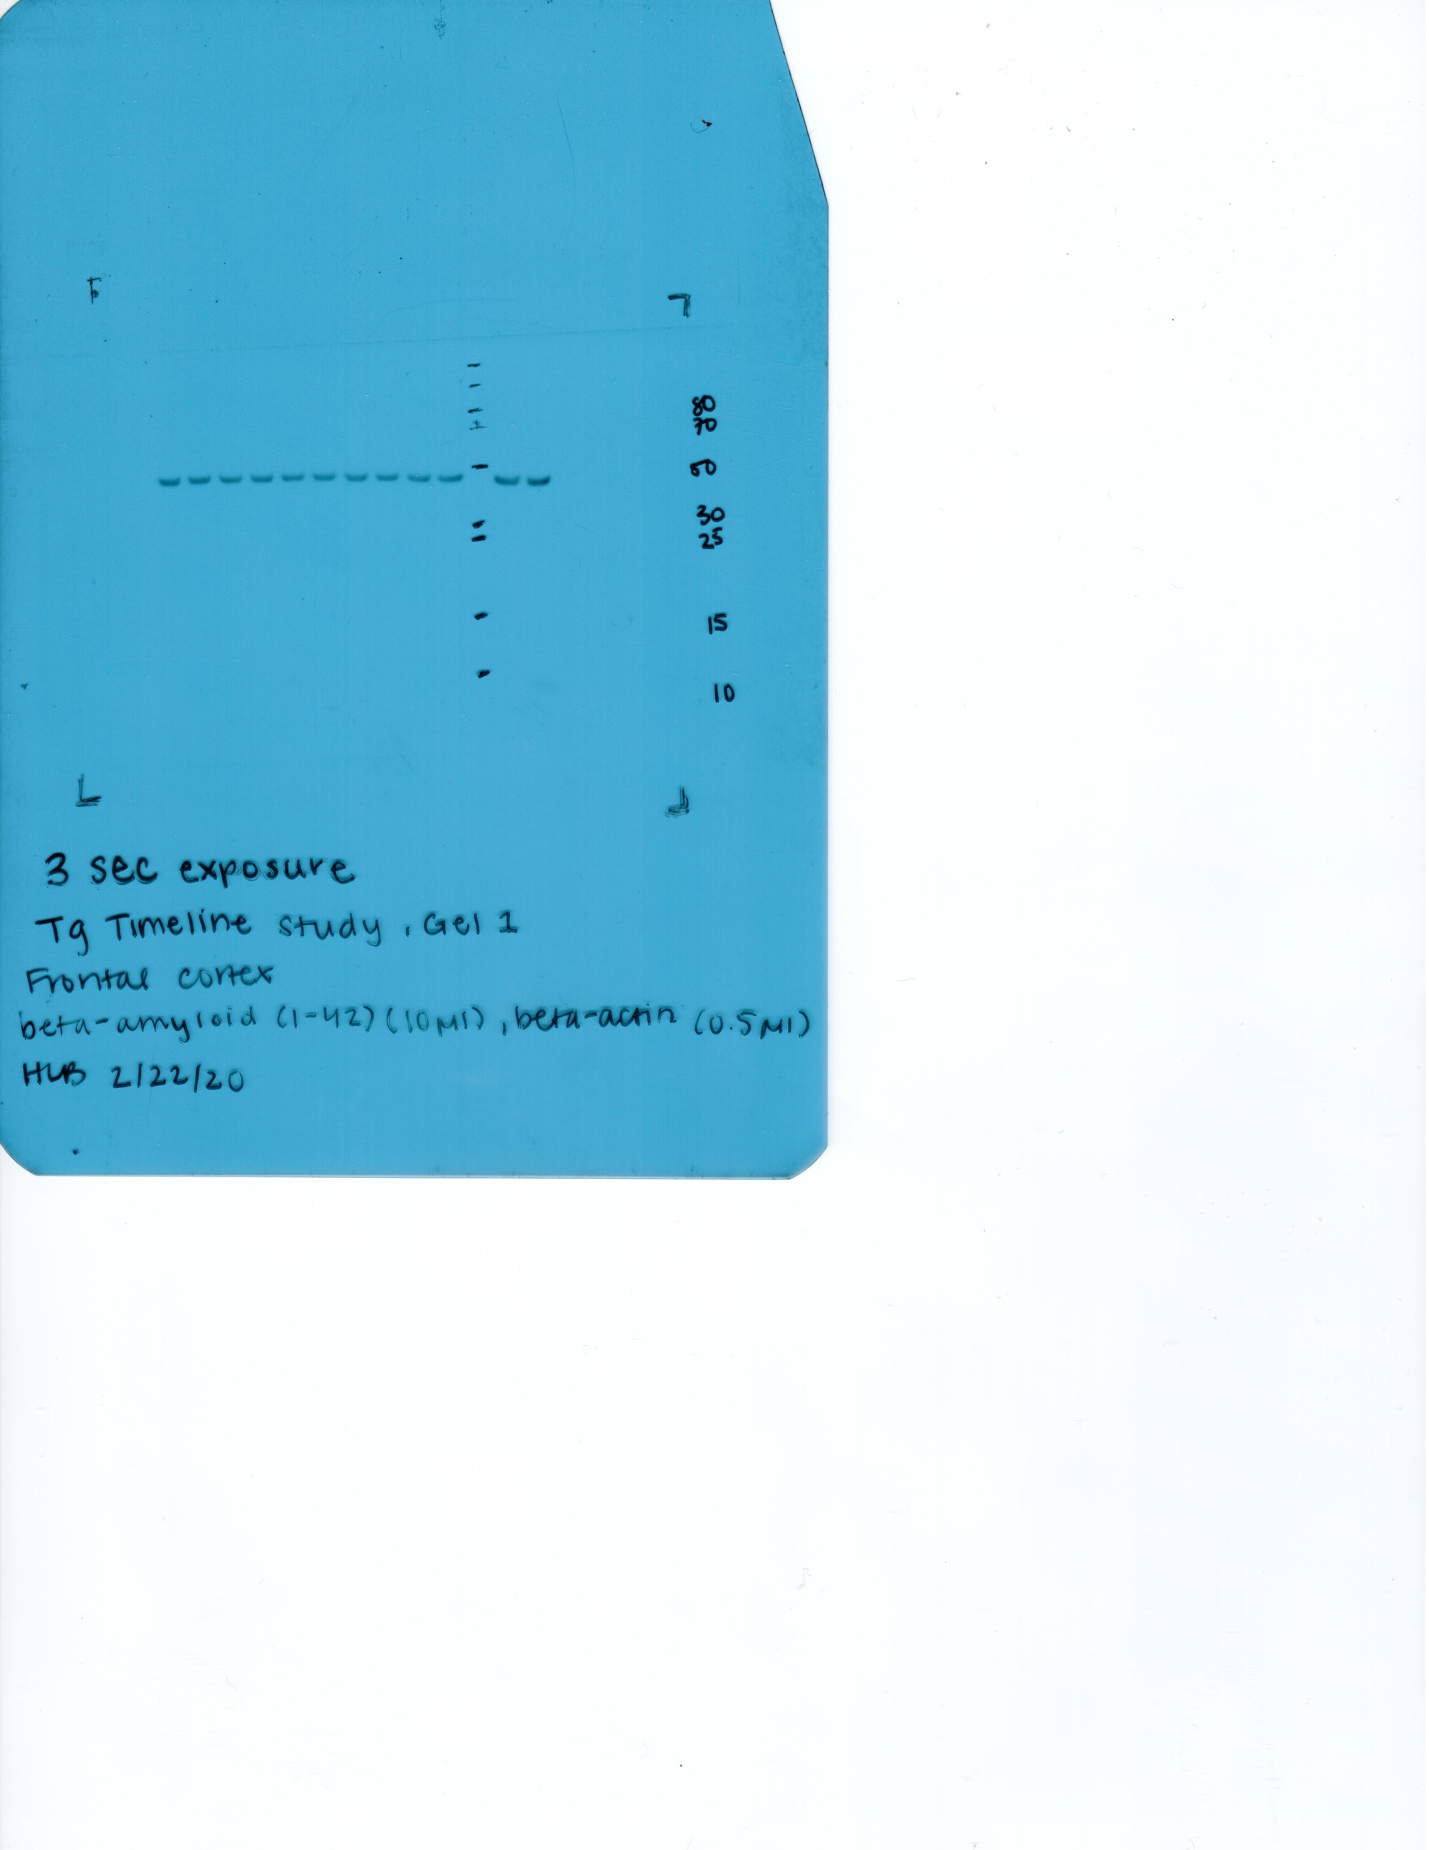


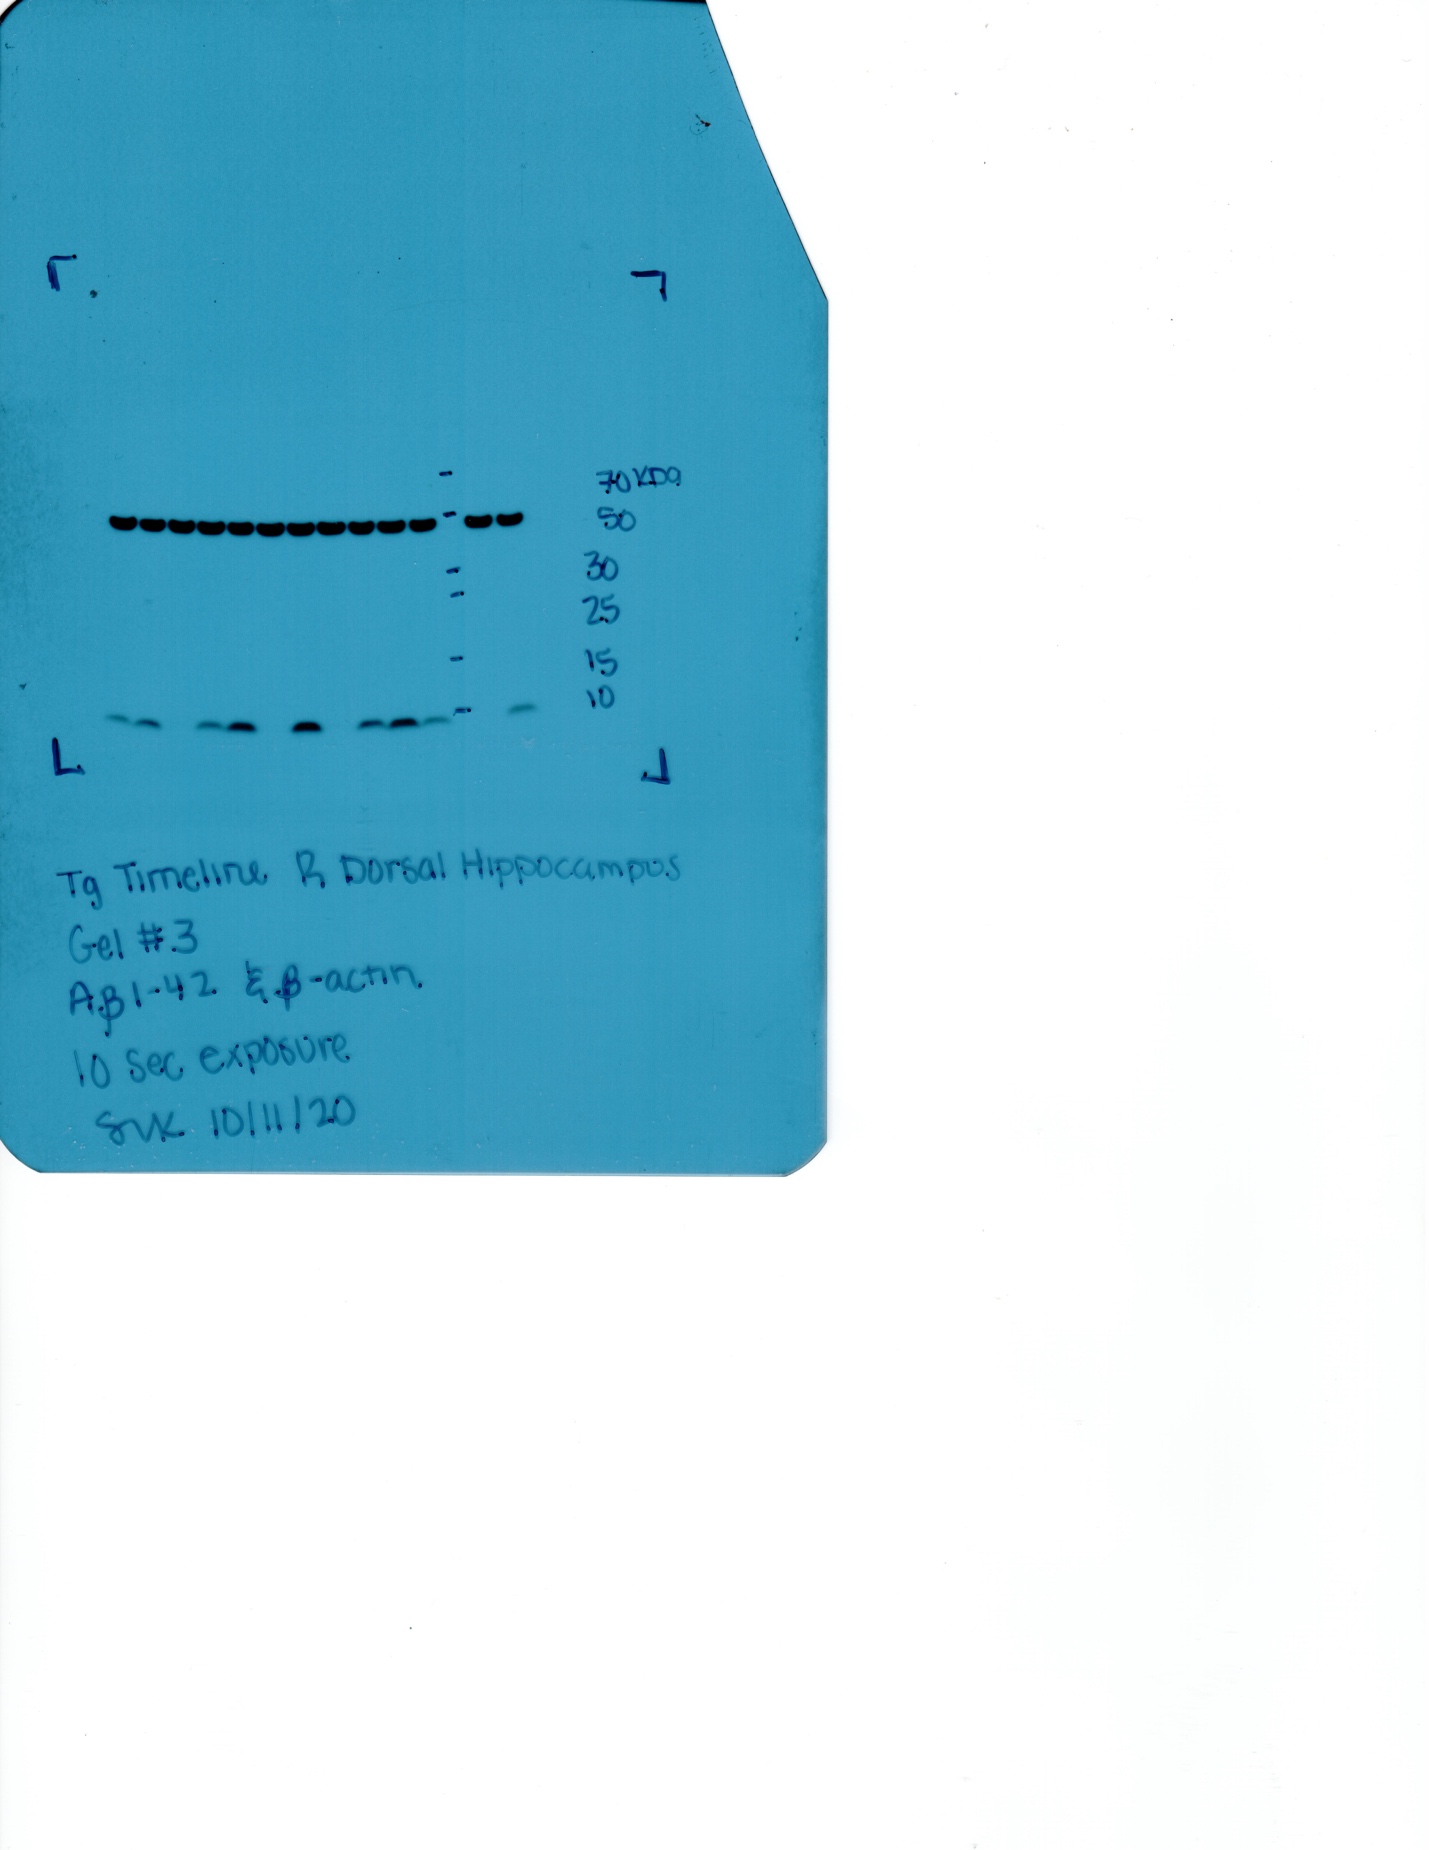


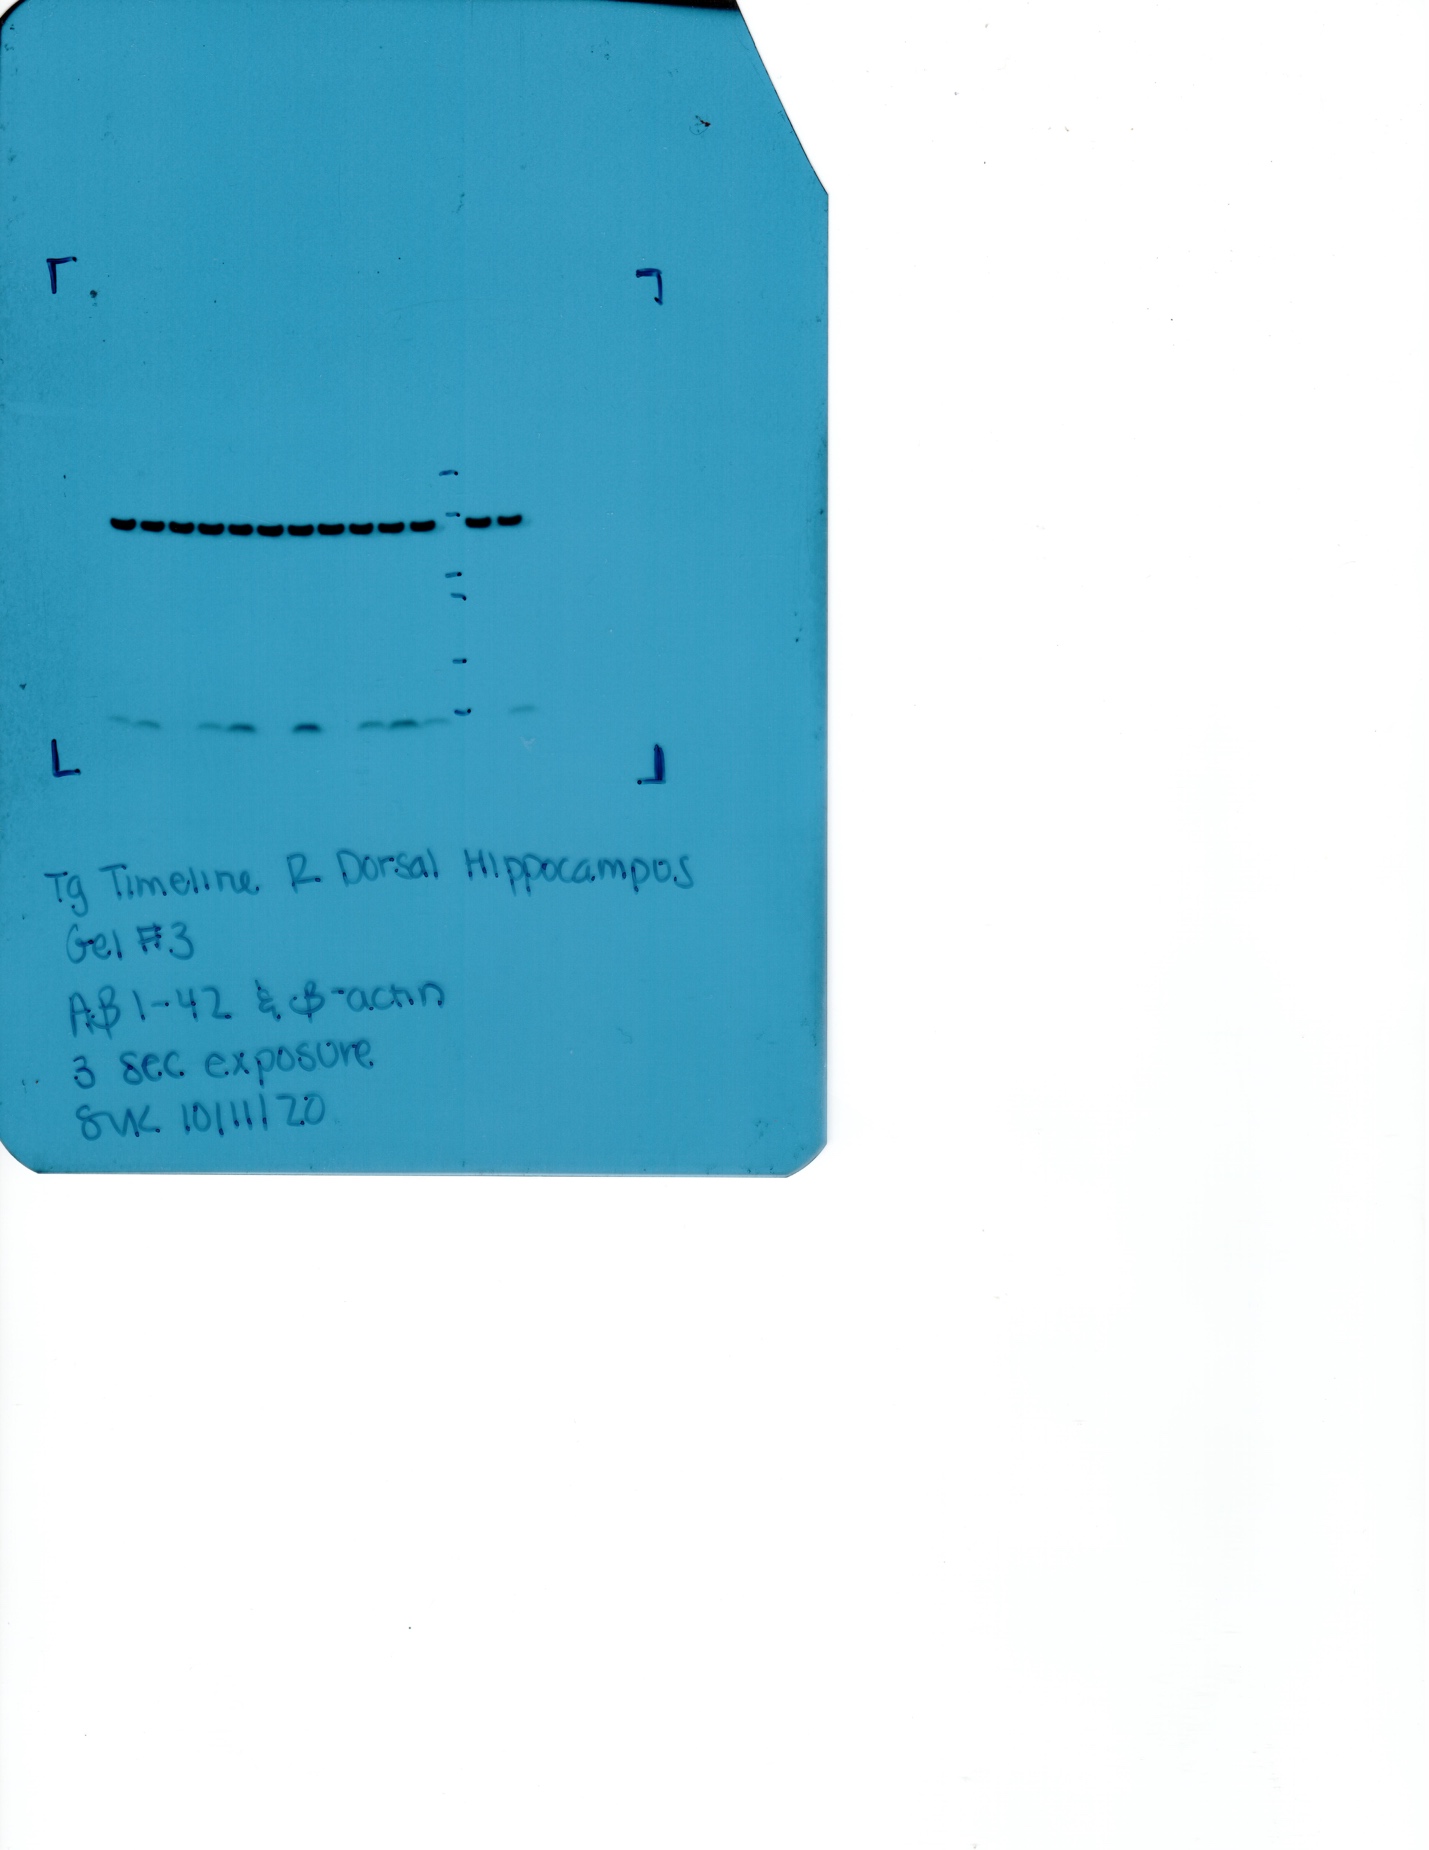


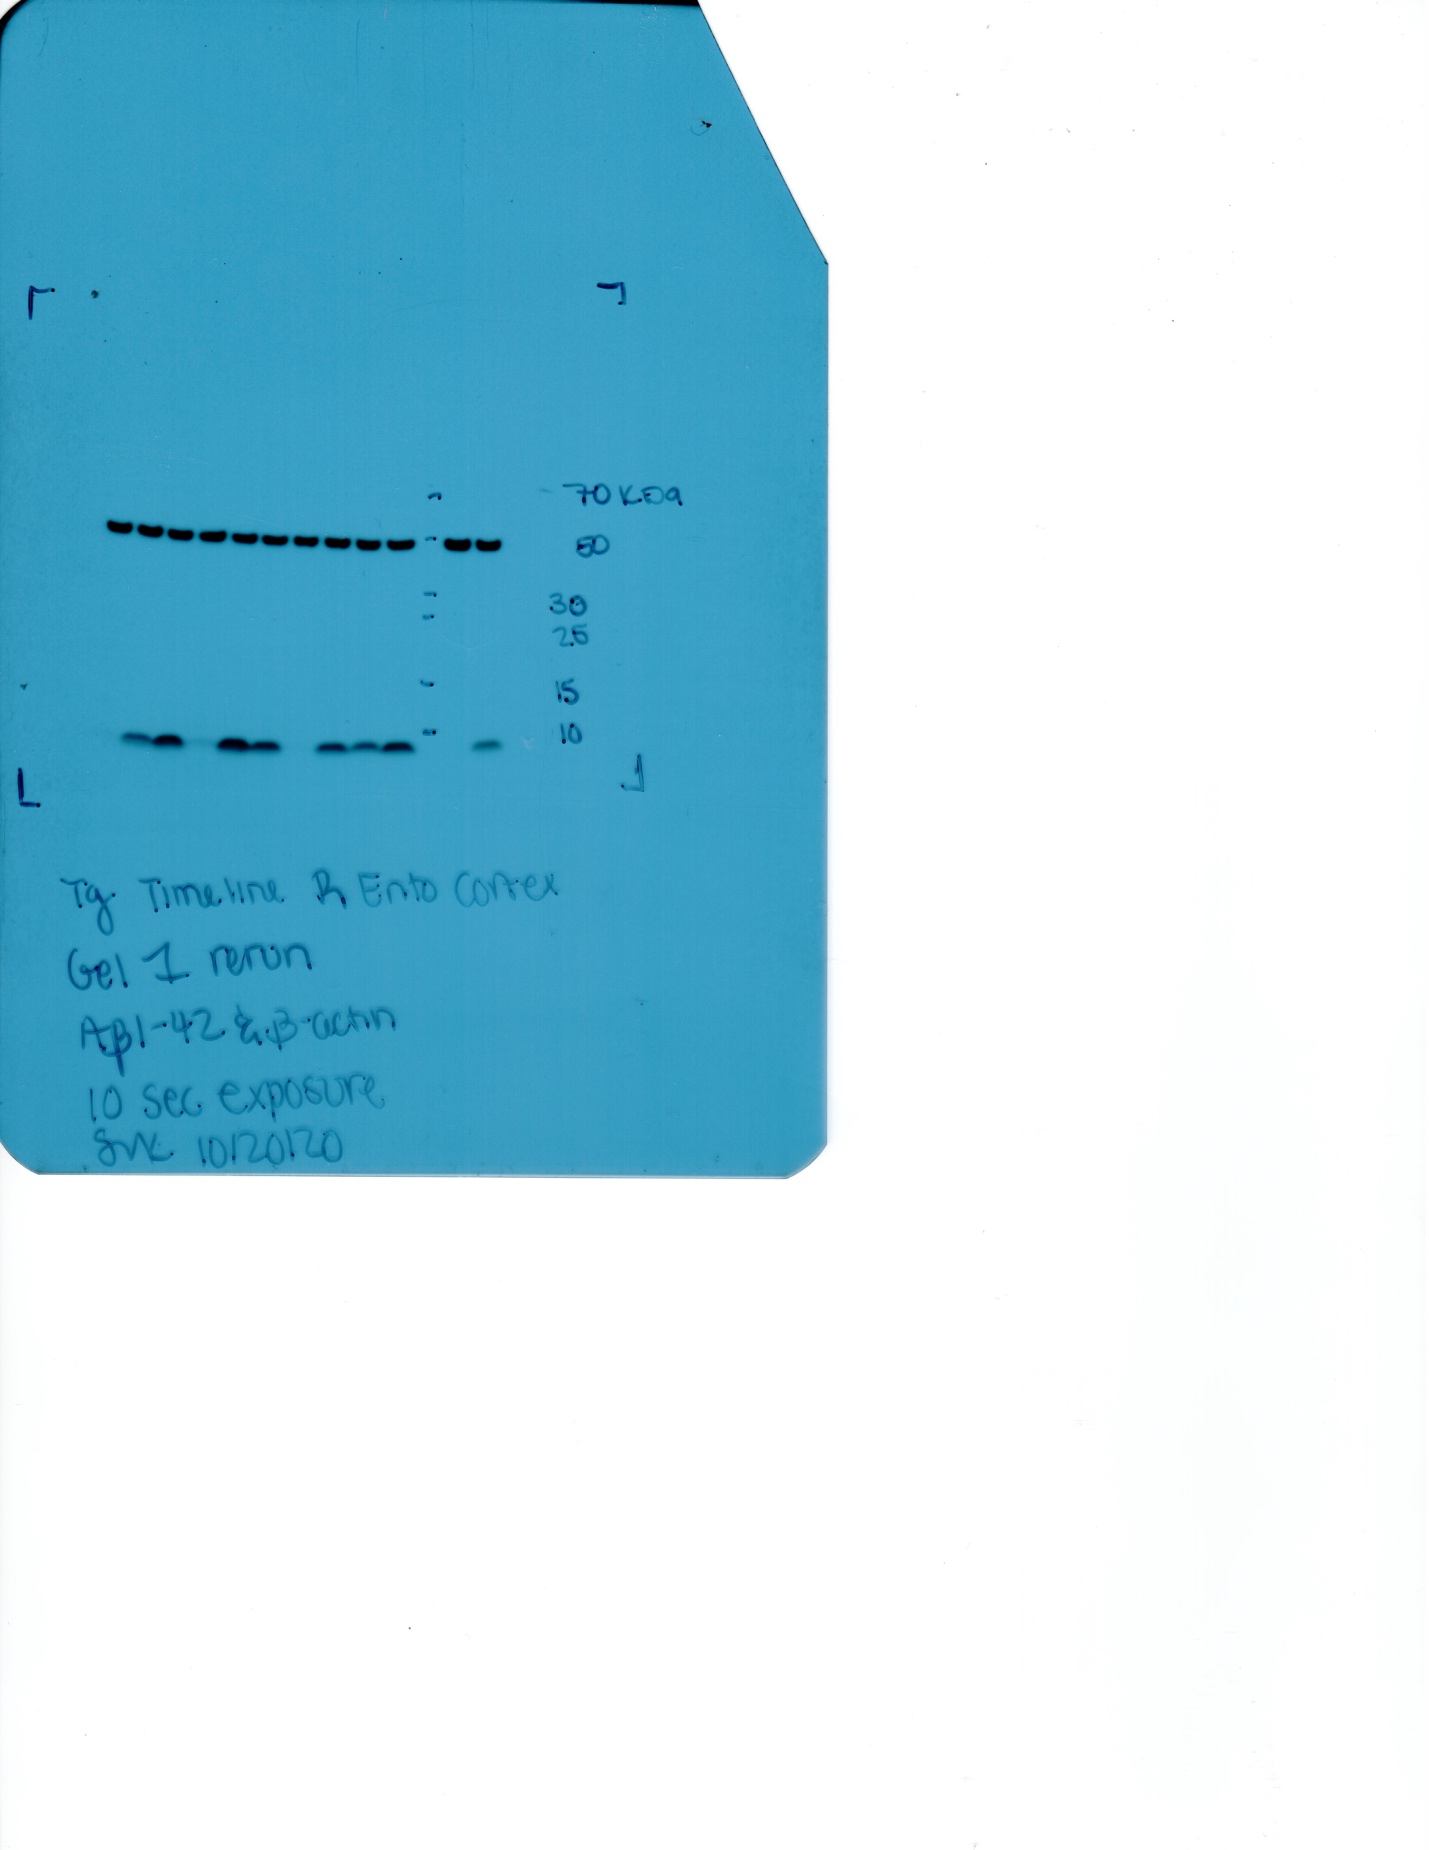


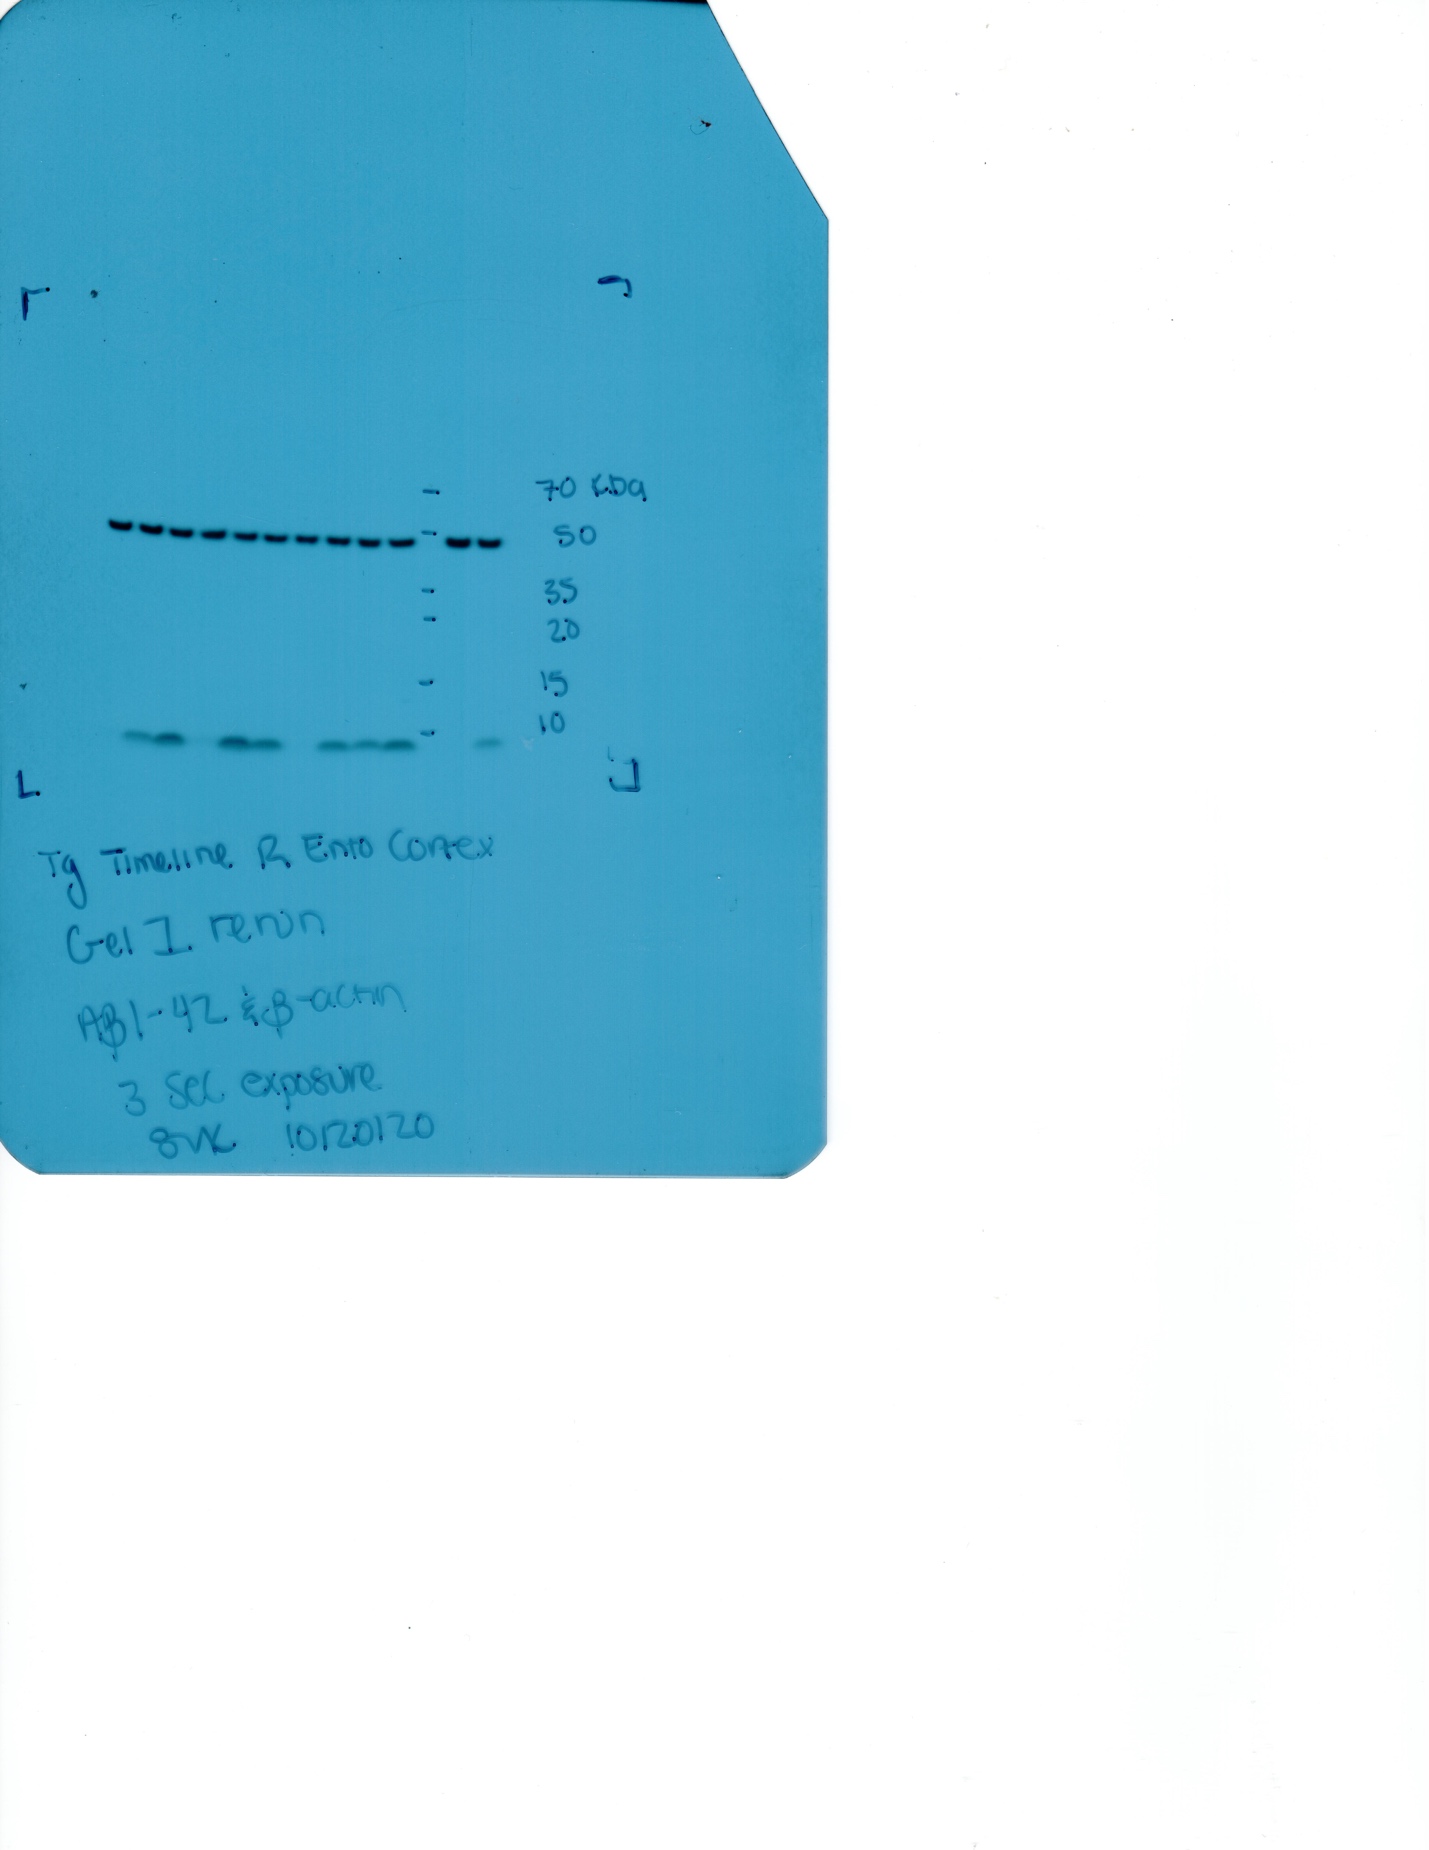

Supplement: Supplementary file 1 [file 9ce0da6ddeaeefab0d21e074.docx]
